# Supplementary material for: Resilience of microbial communities in a simulated drinking water distribution system subjected to disturbances: role of conditionally rare taxa and potential implications for antibiotic-resistant bacteria
Source: Royal Society of Chemistry journal article supplement (doi:10.1039/c6ew00053c), 2016-01-01
Supplement: c6ew00053c1.pdf [file c6ew00053c1.pdf]

## SUPPORTING INFORMATION

### MICROBIAL COMMUNITIES IN A SIMULATED DRINKING WATER DISTRIBUTION SYSTEM SUBJECTED TO DISINFECTANT SWITCHING PRACTICES: RESILIENCE OF ANTIBIOTIC RESISTANCE GENES

V. Gomez-Alvarez, S. Pfaller, J. G. Pressman, D. G. Wahman and R. P. Revetta

#### SUPPLEMENTARY FIGURES

**Figure S1.** Schematic of the chloraminated drinking water distribution system simulator.

**Figure S2.** Biomass concentration, species richness and NRI index values.

**Figure S3.** Whole genome analysis of *Variovorax paradoxus* strains.

**Figure S4.** Whole genome analysis of *Mycobacterium immunogenum* strains.

**Figure S5.** Whole genome analysis of *Sphingopyxis spp* strains.

**Figure S6.** Alignment of the MFS transporter (TetV) amino acid sequences.

**Figure S7.** Alignment of the  $\beta$ -lactamase (class A) amino acid sequences.

#### SUPPLEMENTARY TABLES

**Table S1.** Water quality summary.

**Table S2.** Results of ANOSIM test.

## SUPPLEMENTARY FIGURES

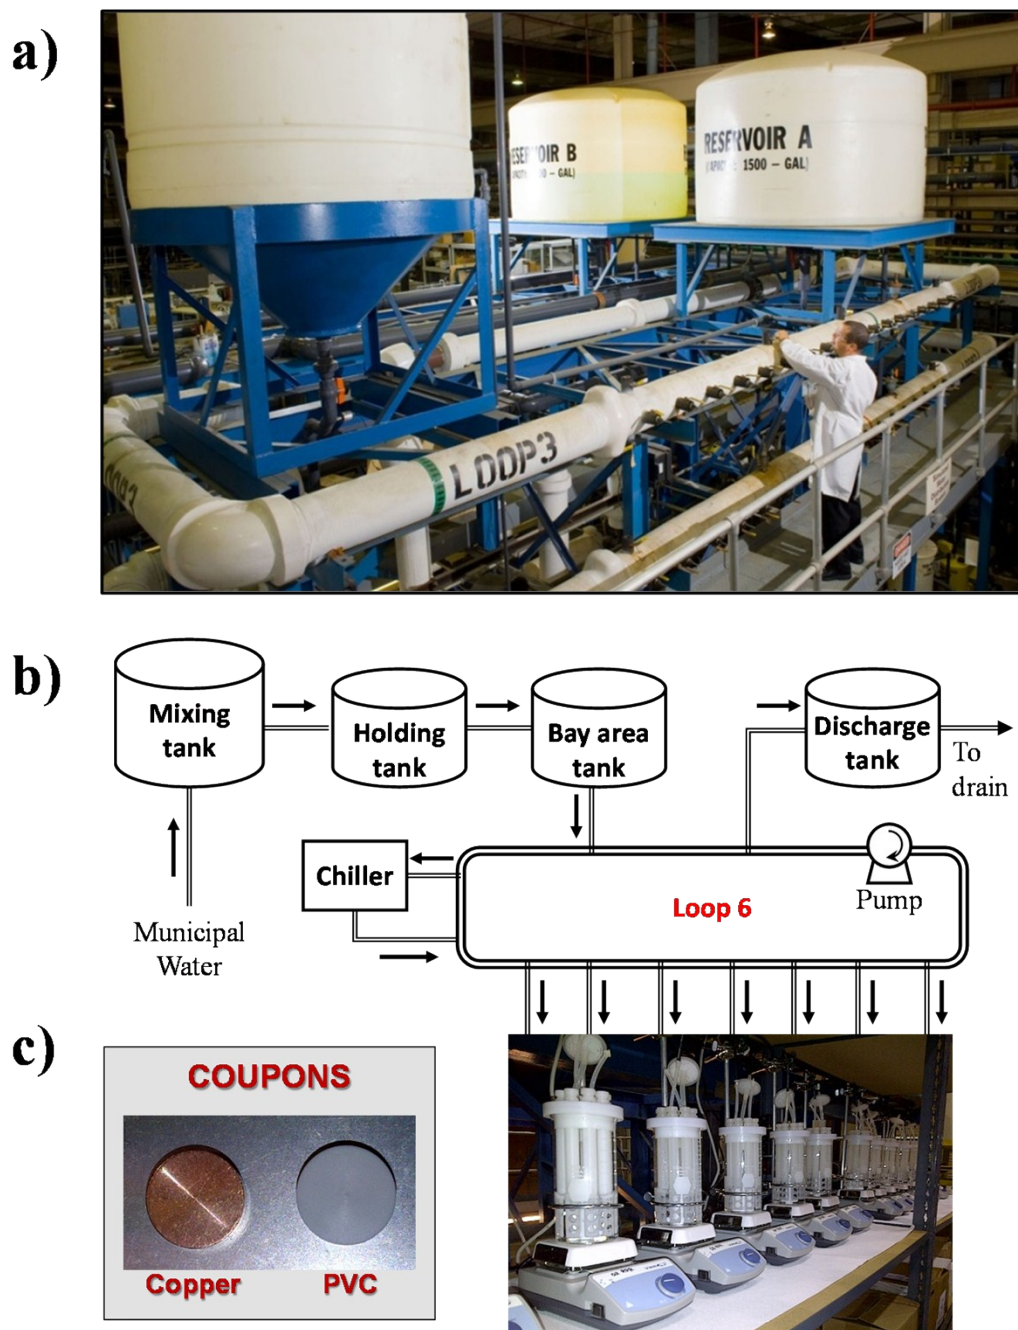

**Figure S1.** (A) Drinking Water Distribution System (DWDS) simulator currently in operation at the US EPA's Test and Evaluation Facility in Cincinnati, Ohio. (B) Experimental apparatus schematic of a distribution system simulator (PVC Pipe Loop #6). (C) Copper and PVC coupons were incubated in off-line CDC reactors.

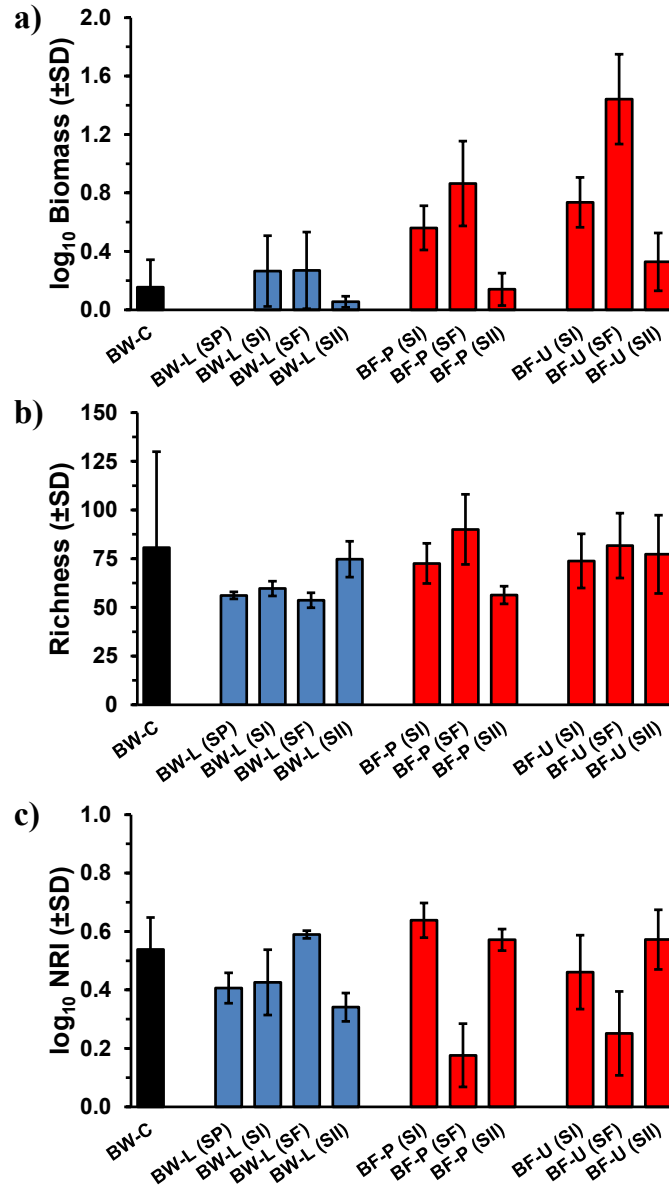

**Figure S2.** Bars representing mean of (A) biomass concentration (to  $\log_{10}$ : ATP, BCA protein, and DNA), (B) species richness ( $S$ ) and (C) net relatedness index (to  $\log_{10}$ : NRI) for bulk water and biofilm communities. High and low NRI index values indicate phylogenetically clustered and overdispersed communities, respectively. Samples were identified by source: biofilm (PVC [BF-P]; Copper [BF-U]) and bulk water (municipal water [BW-C]; DWDS simulator [BW-L]). Operational schemes (in parenthesis): **SP** + **SS** = system stabilization (TP09: 11-15-2012); **SI** = stable chloramine residual (T07: 10-07-2013); **SF** = complete nitrification and minimal chloramine residual (T12: 12-12-2013); **SII** = stable chloramine residual (T13:03-05-2014).

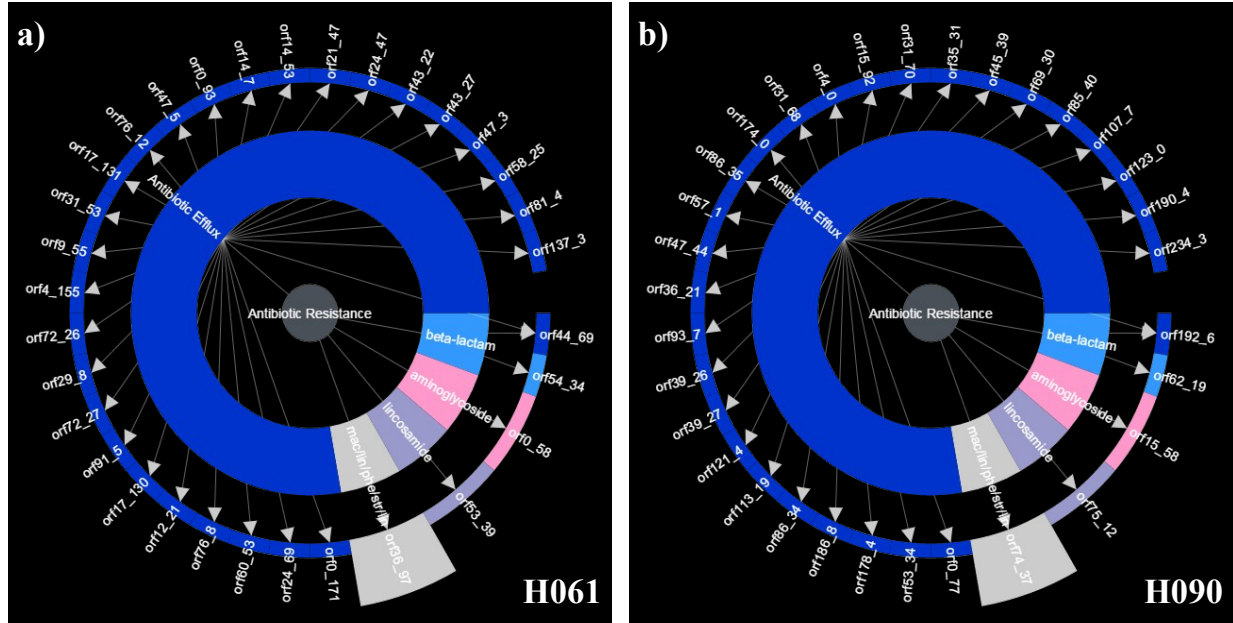

**Figure S3.** Analysis of the whole genome of *Variovorax paradoxus* strains by the Resistance Gene Identifier (RGI) with overall resistance in the center, resistance classes in the middle, and individual resistance genes on the outer (open reading frames). “Resistance wheel” for strains (A) H061 (SF; BF-P) and (B) H090 (SII; BF-U), predicting resistance to a broad range of antibiotic classes. Samples were identified by source: biofilm (PVC [BF-P]; Copper [BF-U]) and bulk water (municipal water [BW-C]; DWDS simulator [BW-L]). Operational schemes (in parenthesis): **SF** = complete nitrification and minimal chloramine residual; **SII** = stable chloramine residual.

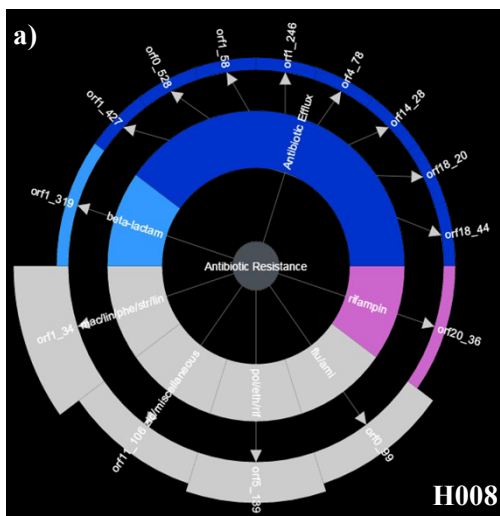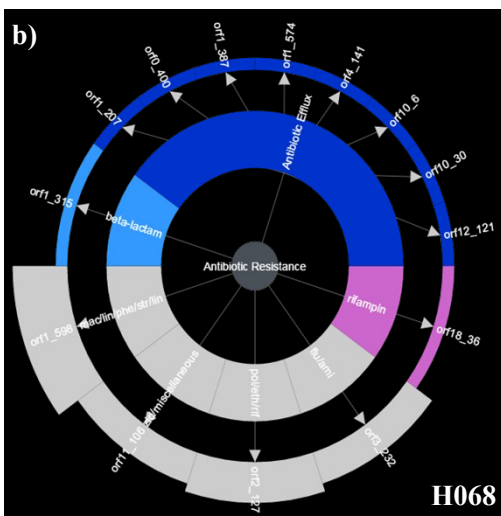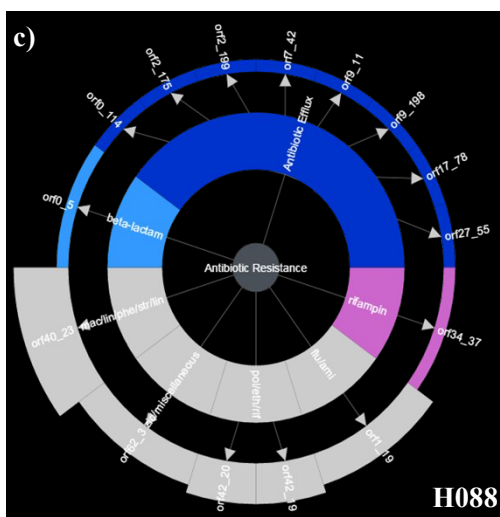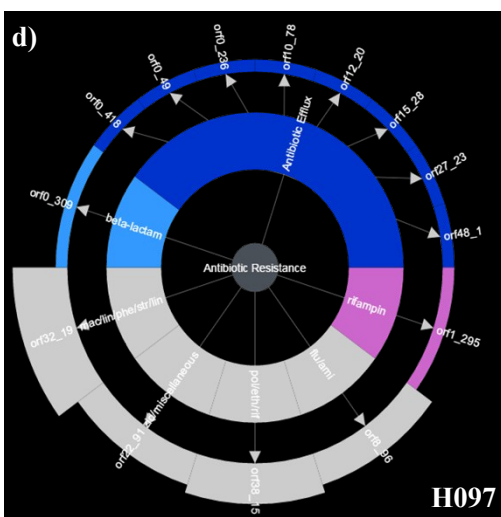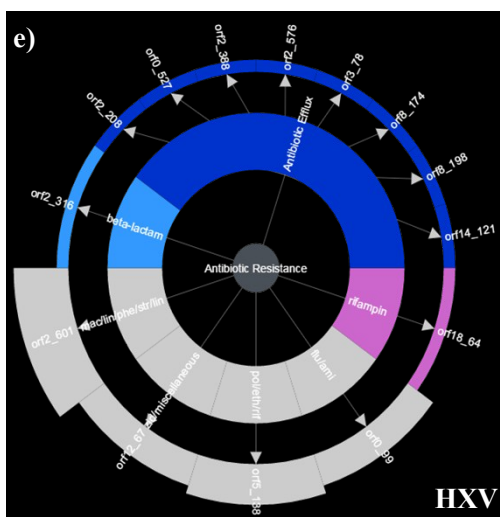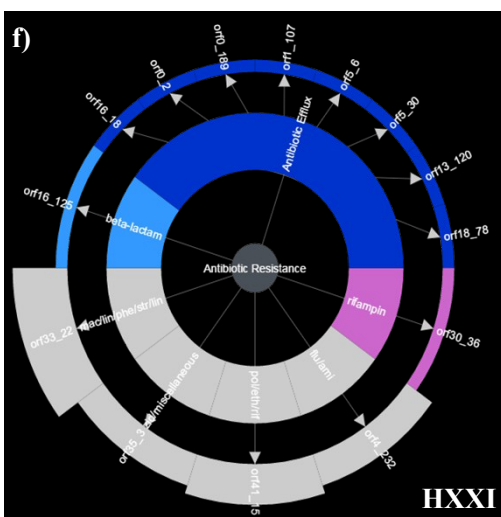

**Figure S4.** Analysis of the whole genome of *Mycobacterium immunogenum* strains by the Resistance Gene Identifier (RGI) with overall resistance in the center, resistance classes in the middle, and individual resistance genes on the outer (open reading frames). “Resistance wheel” for strains (A) H008 (SI; BF-U), (B) H068 (SF; BF-U), (C) H088 (SII; BF-P), (D) H097 (SII; BF-U), (E) HXV (SF; BW-L) and (F) HXXI (SII; BW-L), predicting resistance to a broad range of antibiotic classes. Samples were identified by source: biofilm (PVC [BF-P]; Copper [BF-U]) and bulk water (municipal water [BW-C]; DWDS simulator [BW-L]). Operational schemes (in parenthesis): **SI** = stable chloramine residual; **SF** = complete nitrification and minimal chloramine residual; **SII** = stable chloramine residual.

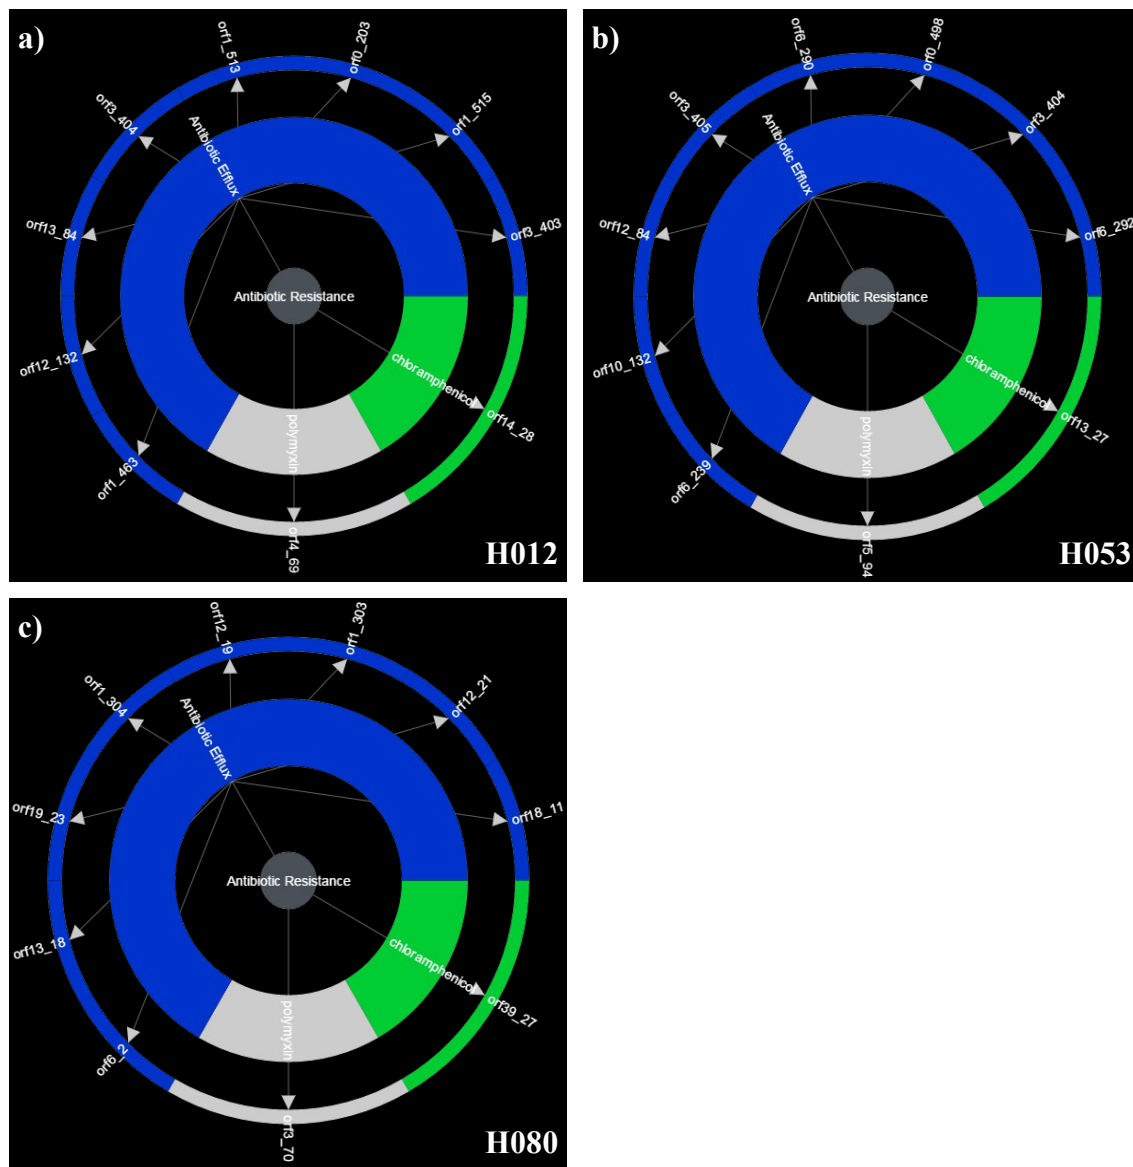

**Figure S5.** Analysis of the whole genome of *Sphingopyxis* spp. by the Resistance Gene Identifier (RGI) with overall resistance in the center, resistance classes in the middle, and individual resistance genes on the outer (open reading frames). “Resistance wheel” for strains (A) H012 (SI; BF-P), (B) H053 (SF; BF-P) and (C) H080 (SII; BF-P), predicting resistance to a broad range of antibiotic classes. Samples were identified by source: biofilm (PVC [BF-P]; Copper [BF-U]) and bulk water (municipal water [BW-C]; DWDS simulator [BW-L]). Operational schemes (in parenthesis): **SI** = stable chloramine residual; **SF** = complete nitrification and minimal chloramine residual; **SII** = stable chloramine residual.



Unconserved 1 2 3 4 5 6 7 8 9 10 Conserved

|                |            |            |           |            |            |    |       |    |       |    |
|----------------|------------|------------|-----------|------------|------------|----|-------|----|-------|----|
|                | .....      | 10         | .....     | 20         | .....      | 30 | ..... | 40 | ..... | 50 |
| H003_orf28_140 | LRHRDYRLLT | LGLAVTLLGN | GMWTVLVWQ | VIRMGLGPAQ | VAIVGTTFSV |    |       |    |       |    |
| H063_orf28_139 | LRHRDYRLLT | LGLAVTLLGN | GMWTVLVWQ | VIRMGLGPAQ | VAIVGTTFSV |    |       |    |       |    |
| H092_orf25_139 | LRHRDYRLLT | LGLAVTLLGN | GMWTVLVWQ | VIRMGLGPAQ | VAIVGTTFSV |    |       |    |       |    |
| HXXIII_orf69_1 | LRHRDYRLLT | LGLAVTLLGN | GMWTVLVWQ | VIRMGLGPAQ | VAIVGTTFSV |    |       |    |       |    |
| Consistency    | *****      | *****      | *****     | *****      | *****      |    |       |    |       |    |

|                |            |            |            |            |             |    |       |    |       |     |
|----------------|------------|------------|------------|------------|-------------|----|-------|----|-------|-----|
|                | .....      | 60         | .....      | 70         | .....       | 80 | ..... | 90 | ..... | 100 |
| H003_orf28_140 | GLLISVLPAG | VAADRLPKLW | VMRCSLAVQT | VLMFTTATLA | LTGAAGHIWHL |    |       |    |       |     |
| H063_orf28_139 | GLLISVLPAG | VAADRLPKLW | VMRCSLAVQT | VLMFTTATLA | LTGAAGHIWHL |    |       |    |       |     |
| H092_orf25_139 | GLLISVLPAG | VAADRLPKLW | VMRCSLAVQT | VLMFTTATLA | LTGAAGHIWHL |    |       |    |       |     |
| HXXIII_orf69_1 | GLLISVLPAG | VAADRLPKLW | VMRCSLAVQT | VLMFTTATLA | LTGAAGHIWHL |    |       |    |       |     |
| Consistency    | *****      | *****      | *****      | *****      | *****       |    |       |    |       |     |

|                |            |            |            |            |            |     |       |     |       |     |
|----------------|------------|------------|------------|------------|------------|-----|-------|-----|-------|-----|
|                | .....      | 110        | .....      | 120        | .....      | 130 | ..... | 140 | ..... | 150 |
| H003_orf28_140 | ALNSLLFGIA | EGFYIPAYTA | LLPSLLPADE | LLAANGIEGV | LRPVMQLAAG |     |       |     |       |     |
| H063_orf28_139 | ALNSLLFGIA | EGFYIPAYTA | LLPSLLPADE | LLAANGIEGV | LRPVMQLAAG |     |       |     |       |     |
| H092_orf25_139 | ALNSLLFGIA | EGFYIPAYTA | LLPSLLPADE | LLAANGIEGV | LRPVMQLAAG |     |       |     |       |     |
| HXXIII_orf69_1 | ALNSLLFGIA | EGFYIPAYTA | LLPSLLPADE | LLAANGIEGV | LRPVMQLAAG |     |       |     |       |     |
| Consistency    | *****      | *****      | *****      | *****      | *****      |     |       |     |       |     |

|                |            |           |            |            |            |     |       |     |       |     |
|----------------|------------|-----------|------------|------------|------------|-----|-------|-----|-------|-----|
|                | .....      | 160       | .....      | 170        | .....      | 180 | ..... | 190 | ..... | 200 |
| H003_orf28_140 | PAVSAAIVSV | WSPGGAFLL | GALVAAGLGC | LLLVRHTEHP | AAAPDVRQHP |     |       |     |       |     |
| H063_orf28_139 | PAVSAAIVSV | WSPGGAFLL | GALVAAGLGC | LLLVRHTEHP | AAAPDVRQHP |     |       |     |       |     |
| H092_orf25_139 | PAVSAAIVSV | WSPGGAFLL | GALVAAGLGC | LLLVRHTEHP | AAAPDVRQHP |     |       |     |       |     |
| HXXIII_orf69_1 | PAVSAAIVSV | WSPGGAFLL | GALVAAGLGC | LLLVRHTEHP | AAAPDVRQHP |     |       |     |       |     |
| Consistency    | *****      | *****     | *****      | *****      | *****      |     |       |     |       |     |

|                |            |            |            |            |            |     |       |     |       |     |
|----------------|------------|------------|------------|------------|------------|-----|-------|-----|-------|-----|
|                | .....      | 210        | .....      | 220        | .....      | 230 | ..... | 240 | ..... | 250 |
| H003_orf28_140 | VRRALADLAE | GFRYMVRTTW | FFATLLFAIG | YVLVVVGPIE | ILLPFVIRDH |     |       |     |       |     |
| H063_orf28_139 | VRRALADLAE | GFRYMVRTTW | FFATLLFAIG | YVLVVVGPIE | ILLPFVIRDH |     |       |     |       |     |
| H092_orf25_139 | VRRALADLAE | GFRYMVRTTW | FFATLLFAIG | YVLVVVGPIE | ILLPFVIRDH |     |       |     |       |     |
| HXXIII_orf69_1 | VRRALADLAE | GFRYMVRTTW | FFATLLFAIG | YVLVVVGPIE | ILLPFVIRDH |     |       |     |       |     |
| Consistency    | *****      | *****      | *****      | *****      | *****      |     |       |     |       |     |

|                |            |            |            |           |            |     |       |     |       |     |
|----------------|------------|------------|------------|-----------|------------|-----|-------|-----|-------|-----|
|                | .....      | 260        | .....      | 270       | .....      | 280 | ..... | 290 | ..... | 300 |
| H003_orf28_140 | GGDPGTHATV | LALFGLAGAA | GSFIVSSLPL | ARRYLTMIL | MWGAGSLPLL |     |       |     |       |     |
| H063_orf28_139 | GGDPGTHATV | LALFGLAGAA | GSFIVSSLPL | ARRYLTMIL | MWGAGSLPLL |     |       |     |       |     |
| H092_orf25_139 | GGDPGTHATV | LALFGLAGAA | GSFIVSSLPL | ARRYLTMIL | MWGAGSLPLL |     |       |     |       |     |
| HXXIII_orf69_1 | GGDPGTHATV | LALFGLAGAA | GSFIVSSLPL | ARRYLTMIL | MWGAGSLPLL |     |       |     |       |     |
| Consistency    | *****      | *****      | *****      | *****     | *****      |     |       |     |       |     |

|                |            |            |            |            |            |     |       |     |       |     |
|----------------|------------|------------|------------|------------|------------|-----|-------|-----|-------|-----|
|                | .....      | 310        | .....      | 320        | .....      | 330 | ..... | 340 | ..... | 350 |
| H003_orf28_140 | LIGFTGRVWM | IALAMIIVGG | TMQAANVIWG | TLMQRRVPEE | MLGRAASMDF |     |       |     |       |     |
| H063_orf28_139 | LIGFTGRVWM | IALAMIIVGG | TMQAANVIWG | TLMQRRVPEE | MLGRAASMDF |     |       |     |       |     |
| H092_orf25_139 | LIGFTGRVWM | IALAMIIVGG | TMQAANVIWG | TLMQRRVPEE | MLGRAASMDF |     |       |     |       |     |
| HXXIII_orf69_1 | LIGFTGRVWM | IALAMIIVGG | TMQAANVIWG | TLMQRRVPEE | MLGRAASMDF |     |       |     |       |     |
| Consistency    | *****      | *****      | *****      | *****      | *****      |     |       |     |       |     |

|                |            |            |            |            |            |     |       |     |       |     |
|----------------|------------|------------|------------|------------|------------|-----|-------|-----|-------|-----|
|                | .....      | 360        | .....      | 370        | .....      | 380 | ..... | 390 | ..... | 400 |
| H003_orf28_140 | FVSLVGLPAS | FALVVPVAHI | IGNTTVFVIA | GVAPLVLAVI | AHIVARLGRD |     |       |     |       |     |
| H063_orf28_139 | FVSLVGLPAS | FALVVPVAHI | IGNTTVFVIA | GVAPLVLAVI | AHIVARLGRD |     |       |     |       |     |
| H092_orf25_139 | FVSLVGLPAS | FALVVPVAHI | IGNTTVFVIA | GVAPLVLAVI | AHIVARLGRD |     |       |     |       |     |
| HXXIII_orf69_1 | FVSLVGLPAS | FALVVPVAHI | IGNTTVFVIA | GVAPLVLAVI | AHIVARLGRD |     |       |     |       |     |
| Consistency    | *****      | *****      | *****      | *****      | *****      |     |       |     |       |     |

|                |         |
|----------------|---------|
|                | .....   |
| H003_orf28_140 | EMAHPLG |
| H063_orf28_139 | EMAHPLG |
| H092_orf25_139 | EMAHPLG |
| HXXIII_orf69_1 | EMAHPLG |
| Consistency    | *****   |



**Figure S6.** Alignment of the MFS transporter (TetV) amino acid sequences from *Mycobacterium chelonae* strains, colored according to relative sequence conservation at each position. The scoring scheme ranges from 0 for the least conserved alignment position up to 10 (indicated by an asterisk) for the most conserved alignment position. *M. chelonae* strains H003 (SI; BF-P; accession number: KRQ26162.), H063 (SF; BF-P; KRQ48799), H092 (SII; BF-P; KRQ36340) and HXXIII (SII; BW-L; KRQ78148). Samples were identified by source: biofilm (PVC [BF-P]; Copper [BF-U]) and bulk water (municipal water [BW-C]; DWDS simulator [BW-L]). Operational schemes (in parenthesis): **SI** = stable chloramine residual; **SF** = complete nitrification and minimal chloramine residual; **SII** = stable chloramine residual.

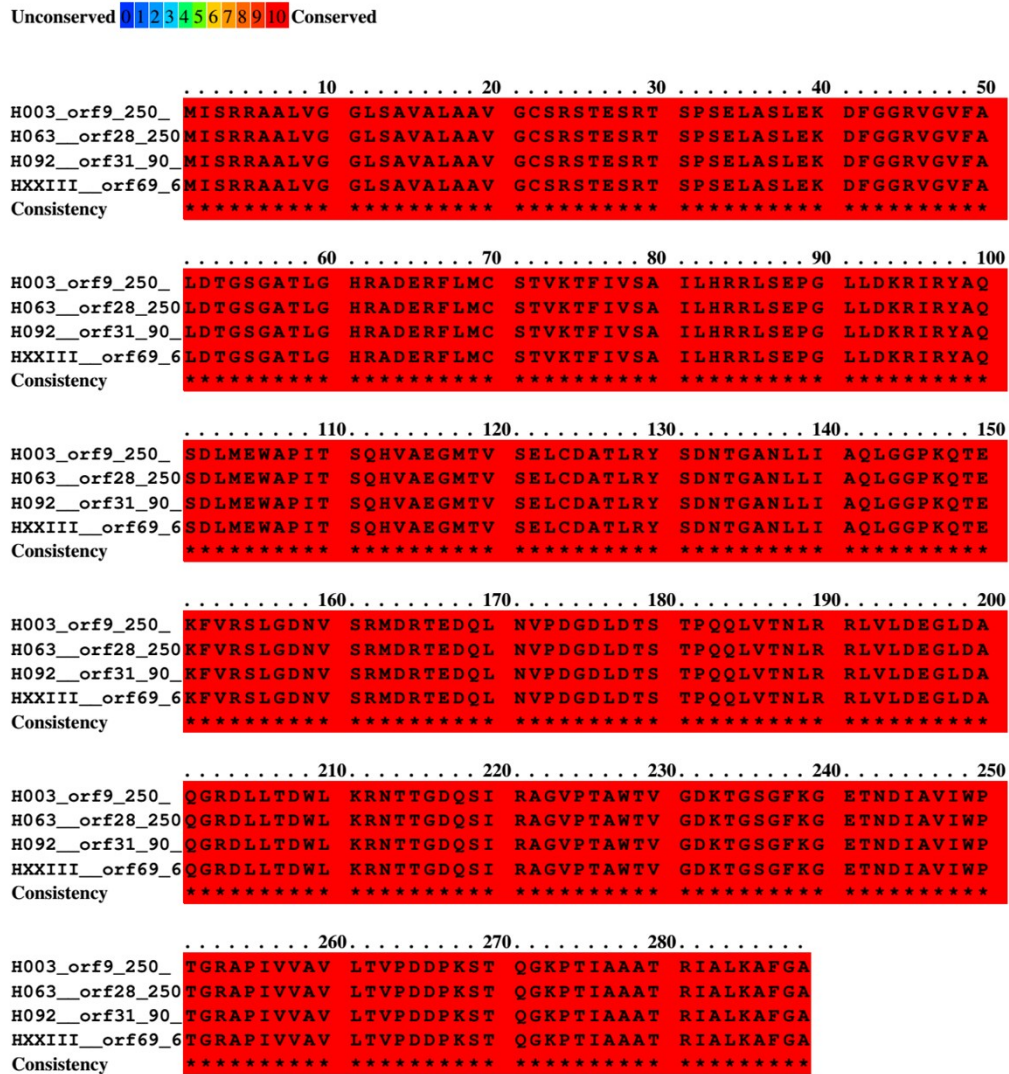

**Figure S7.** Alignment of the  $\beta$ -lactamase (class A) amino acid sequences from *Mycobacterium chelonae* strains, colored according to relative sequence conservation at each position. The scoring scheme ranges from 0 for the least conserved alignment position up to 10 (indicated by an asterisk) for the most conserved alignment position. *M. chelonae* strains H003 (SI; BF-P; accession number: KRQ25928), H063 (SF; BF-P; KRQ48633), H092 (SII; BF-P; KRQ35053) and HXXIII (SII; BW-L; KRQ77943). Samples were identified by source: biofilm (PVC [BF-P]; Copper [BF-U]) and bulk water (municipal water [BW-C]; DWDS simulator [BW-L]). Operational schemes (in parenthesis): **SI** = stable chloramine residual; **SF** = complete nitrification and minimal chloramine residual; **SII** = stable chloramine residual.

## SUPPLEMENTARY TABLES

**Table S1.** Water quality values for operational schemes in the pipe-loop system\*.

| Characteristics <sup>§</sup>                             | Operational schemes <sup>‡</sup> |               |               |               |               |
|----------------------------------------------------------|----------------------------------|---------------|---------------|---------------|---------------|
|                                                          | SP + SS                          | SI            | SF            | SR            | SII           |
| <b>Parameters</b>                                        |                                  |               |               |               |               |
| temperature [°C]                                         | 18.4 ± 0.0                       | 17.9 ± 0.6    | 23.7 ± 0.8    | 24.0 ± 0.0    | 19.3 ± 2.1    |
| pH                                                       | 8.19 ± 0.14                      | 7.88 ± 0.07   | 7.86 ± 0.10   | 7.78 ± 0.03   | 7.85 ± 0.17   |
| turbidity [NTU]                                          | 0.27 ± 0.36                      | 0.09 ± 0.03   | 0.11 ± 0.04   | 0.29 ± 0.28   | 0.62 ± 0.49   |
| ORP <sup>†</sup> [mV]                                    | 582.3 ± 17.9                     | 586.6 ± 25.8  | 486.3 ± 47.4  | 839.2 ± 123.5 | 501.7 ± 89.1  |
| pump flow rate [g min <sup>-1</sup> ]                    | 80.9 ± 5.7                       | 86.4 ± 0.6    | 88.0 ± 0.6    | 88.5 ± 0.9    | 86.7 ± 1.1    |
| <b>Disinfectant</b>                                      |                                  |               |               |               |               |
| NH <sub>2</sub> Cl [Cl <sub>2</sub> mg L <sup>-1</sup> ] | 1.71 ± 0.42                      | 0.91 ± 0.36   | 0.12 ± 0.12   | 0.02 ± 0.01   | 1.17 ± 0.42   |
| Free Chlorine [Cl <sub>2</sub> mg L <sup>-1</sup> ]      | ND                               | ND            | 0.01 ± 0.00   | 2.72 ± 0.82   | 0.03 ± 0.30   |
| <b>N &amp; P compounds</b>                               |                                  |               |               |               |               |
| Ammonia-Nitrogen [mg L <sup>-1</sup> ]                   | 0.20 ± 0.08                      | 0.23 ± 0.05   | 0.05 ± 0.05   | 0.01 ± 0.01   | 0.18 ± 0.06   |
| Nitrite-Nitrogen [mg L <sup>-1</sup> ]                   | 0.009 ± 0.002                    | 0.006 ± 0.002 | 0.198 ± 0.065 | 0.003 ± 0.002 | 0.005 ± 0.004 |
| Nitrate-Nitrogen [mg L <sup>-1</sup> ]                   | 0.74 ± 0.12                      | 1.02 ± 0.14   | 0.91 ± 0.18   | 0.92 ± 0.04   | 0.99 ± 0.23   |
| Phosphate [mg L <sup>-1</sup> ]                          | 0.14 ± 0.03                      | 0.15 ± 0.04   | 0.21 ± 0.06   | 0.07 ± 0.03   | 0.14 ± 0.03   |

\*Pipe-loop properties: 150 mm gray schedule 80 PVC; 0.30 m s<sup>-1</sup> recirculation flow rate; 27 m length.

<sup>§</sup>Average (±SD) results from continuous measurements.

<sup>‡</sup>Operational schemes: **SP + SS** = system stabilization; **SI** = stable chloramine residual; **SF** = complete nitrification and minimal chloramine residual; **SR** = chlorine burn; **SII** = stable chloramine residual.

<sup>†</sup>ORP, oxidation reduction potential.

ND = not determined.

**Table S2.** Results of ANOSIM test based on Jensen-Shannon dissimilarity matrix derived from the distribution of microbial communities\*. Operational schemes (in parenthesis): **SI** = stable chloramine residual; **SF** = complete nitrification and minimal chloramine residual; **SII** = stable chloramine residual.

| Source of variation <sup>§</sup>  | Global $R^*$ | $p$    | Permutations |
|-----------------------------------|--------------|--------|--------------|
| <b>One-way ANOSIM</b>             |              |        |              |
| <b>Global tests</b>               |              |        |              |
| disinfectant                      | 0.851        | <0.001 | 9999         |
| disturbance                       | 0.794        | <0.001 | 9999         |
| coupons/operational scheme        | 0.685        | <0.001 | 9999         |
| source/operational scheme         | 0.728        | <0.001 | 9999         |
| <b>Pairwise tests<sup>†</sup></b> |              |        |              |
| disturbance                       |              |        |              |
| BF (S) vs. BF (SF)                | 0.713        | <0.001 | 9999         |
| BL (S) vs. BL (SF)                | 0.875        | <0.001 | 9999         |
| coupons/operational scheme        |              |        |              |
| BF-P (SI) vs BF-U (SI)            | 0.152        | 0.083  | 9999         |
| BF-P (SF) vs BF-U (SF)            | 0.227        | 0.072  | 9999         |
| BF-P (SII) vs BF-U (SII)          | 0.000        | 1      | 9999         |
| source/operational scheme         |              |        |              |
| BW-L (SI) vs BF (SI)              | 0.793        | 0.003  | 9999         |
| BW-L (SF) vs BF (SF)              | 0.911        | 0.003  | 9999         |
| BW-L (SII) vs BF (SII)            | 0.960        | 0.003  | 9999         |

\*Samples were identified by source: biofilm (PVC [BF-P]; Copper [BF-U]) and bulk water (municipal water [BW-C]; DWDS simulator [BW-L]).

†Global tests on the effect of biofilm devices: disinfectant (chlorine [ $n = 36$ ] vs chloramine [ $n = 177$ ]); disturbance (S [ $n = 131$ ] vs SF [ $n = 46$ ]); coupons (PVC [ $n = 48$ ] vs copper [ $n = 51$ ]); source (BW-L [ $n = 79$ ] vs BF [ $n = 99$ ]).

§ $R$  values greater than 0 (up to 1) indicate dissimilarities between groups, whereas those values near 0 indicate a true null hypothesis of no difference between groups (Clarke, 1993).

†Significance set at  $\alpha = 0.05$ .
